# Supplementary material for: Relationship between Cataract Surgery and Mortality in Elderly Patients with Cataract: Nationwide Population-Based Cohort Study in South Korea
Source: MDPI journal article supplement (doi:10.3390/jpm11111128), 2021-11-01
Supplement: s1 [file s1]

**Table S1.** Korean Standard Classification of Diseases (KCD) codes and Korean Electronic Data Interchange (KEDI) codes included in definition of cataract and cataract surgery.

| Condition                                 | Eligible KCD Diagnosis Code                                                                         |
|-------------------------------------------|-----------------------------------------------------------------------------------------------------|
| Cataract                                  | H25.0, H25.1, H25.2, H25.8, H25.9, H26.02, H26.21, H26.28, H26.3, H26.8, H26.9, H28.0, H28.1, H28.2 |
| Severe cataract                           | H25.1, H25.2                                                                                        |
| Cataract surgery                          | Eligible KEDI Code                                                                                  |
| extracapsular or intracapsular extraction | S5111                                                                                               |
| phacoemulsification                       | S5119                                                                                               |
| primary intraocular lens implantation     | S5117                                                                                               |

KCD, Korean Standard Classification of Diseases; KEDI, Korean Electronic Data Interchange.

**Table S2.** Korean Standard Classification of Diseases (KCD) codes included in mortality attributed to specific systemic conditions.

| Type of Mortality                | Eligible KCD Diagnosis Code                                                                                                                                                             |
|----------------------------------|-----------------------------------------------------------------------------------------------------------------------------------------------------------------------------------------|
| Cancer death                     | C00-C14, C15-C26, C30-C39, C40-C41, C43-C44, C45-C49, C50, C51-C58, C60-C63, C64-C68, C69-C72, C73-C75, C76-C80, C81-C96, C97-C97, D00-D09, D10-D36, D37-D48                            |
| Vascular death                   | I00-I02, I05-I09, I10-I15, I20-I25, I26-I28, I30-I52, I60-I69, I70-I79, I80-I89, I95-I99                                                                                                |
| Pulmonary death                  | J00-J06, J09-J18, J20-J22, J30-J39, J40-J47, J60-J70, J80-J84, J85-J86, J90-J94, J95-J99                                                                                                |
| Neurologic death                 | G00-G09, G10-G14, G20-G26, G30-G32, G35-G37, G40-G47, G50-G59, G60-G64, G70-G73, G80-G83, G90-G99                                                                                       |
| Infection-related death          | A00-A09, A15-A19, A20-A28, A30-A49, A50-A64, A65-A69, A70-A74, A75-A79, A80-A89, A90-A99, B00-B09, B15-B19, B20-B24, B25-B34, B35-B49, B50-B64, B65-B83, B85-B89, B90-B94, B95-B98, B99 |
| Accident or trauma related death | V01-V99, W00-W99, X00-X84, X85-Y09, Y10-Y34, Y35-Y36, Y40-Y59, Y60-Y69, Y70-Y82, Y83-Y84, Y85-Y89, Y90-Y98                                                                              |

KCD, Korean Standard Classification of Diseases.

**Table S3.** Korean Standard Classification of Diseases (KCD) codes included in the definition of comorbidities.

| Comorbidity               | Eligible KCD Diagnosis Code            |
|---------------------------|----------------------------------------|
| Lymphomas                 | C81-C86, C88                           |
| Multiple myeloma/leukemia | C90-C96                                |
| Malignant neoplasms       | C00-97                                 |
| Myocardial infarction     | I21-I23                                |
| Heart failure             | I50, I97.1, I09.9, I11.0, I13.0, I13.2 |
| Cerebrovascular disease   | I60-I69                                |

|                                                  |                                                                                                        |
|--------------------------------------------------|--------------------------------------------------------------------------------------------------------|
| Peripheral vascular disease                      | I73                                                                                                    |
| Chronic pulmonary disease                        | J44, I27.9, J84                                                                                        |
| Cirrhosis                                        | K70.3, K71.7, K74, K76.1                                                                               |
| Hepatic failure                                  | K70.4, K71.1, K72                                                                                      |
| AIDS                                             | B20-B24                                                                                                |
| Hemi/paraplegia                                  | G04.1, G11.4, G81-82, I69.006, I69.106, I69.206, I69.306, I69.406                                      |
| Rheumatologic disease                            | M05, M06, M10, M12.0, M12.3, M30-M36                                                                   |
| Dementia                                         | F00-F03, F05.1, G31.82                                                                                 |
| Diabetes mellitus                                | E10-E14                                                                                                |
| Diabetes mellitus with complications             | E10.0-E10.8, E11.0-E11.8, E12.0-E12.8, E13.0-E13.8, E14.0-E14.8                                        |
| Chronic renal disease                            | E10.22, E12.22, E13.22, E14.22, I12, I13                                                               |
| Peptic ulcer disease                             | K27                                                                                                    |
| Glaucoma                                         | H40, H42                                                                                               |
| Age-related macular degeneration                 | H35.30, H35.31, H35.39                                                                                 |
| Diabetes mellitus with ophthalmic manifestations | E10.3 <sup>†</sup> , E11.3 <sup>†</sup> , E12.3 <sup>†</sup> , E13.3 <sup>†</sup> , E14.3 <sup>†</sup> |

---

KCD, Korean Standard Classification of Diseases; AIDS, Acquired immune deficiency syndrome.

<sup>†</sup>1,2,3,4,8.
